# Supplementary material for: Biodegradable polymer–lipid monolayers as templates for calcium phosphate mineralization
Source: Royal Society of Chemistry journal article supplement (doi:10.1039/c2tb00083k), 2012-11-15
Supplement: c2tb00083k.pdf [file c2tb00083k.pdf]

# Biodegradable polymer-lipid monolayers as templates for calcium phosphate mineralization

## Supporting Information

A. Jagoda, M. Zinn, E. Bieler, W. Meier and K. Kita-Tokarczyk

Received (in XXX, XXX) Xth XXXXXXXXXX 20XX, Accepted Xth XXXXXXXXXX 20XX  
DOI: 10.1039/b000000x

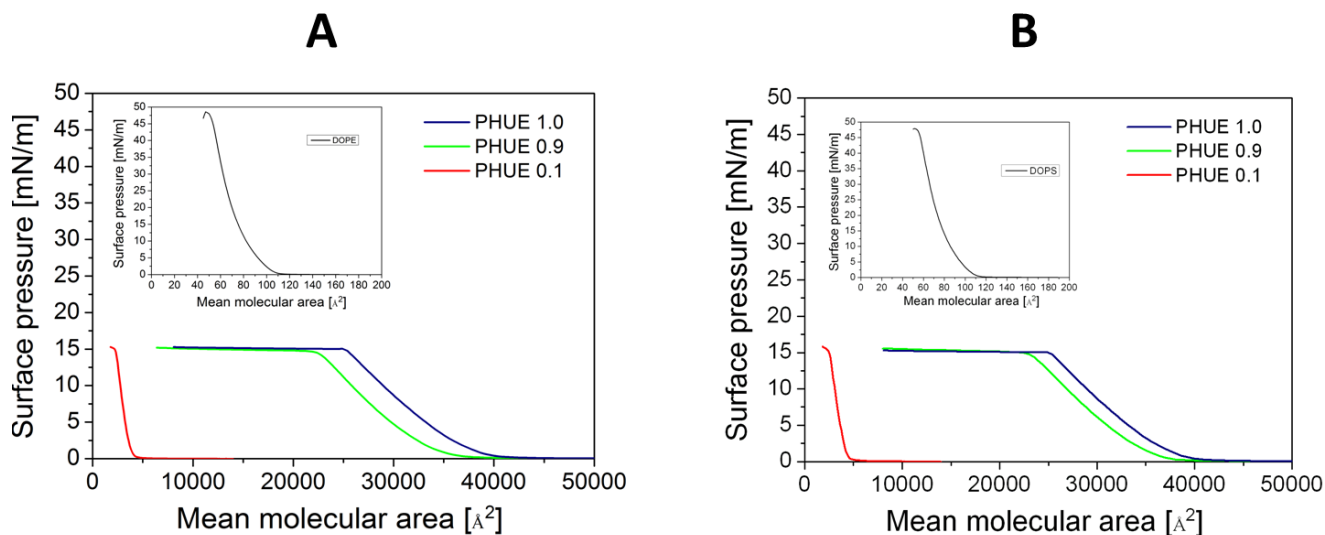

Fig. S1  $\pi$ -A isotherms from PHUE-DOPE (A) and PHUE-DOPS (B) mixed films

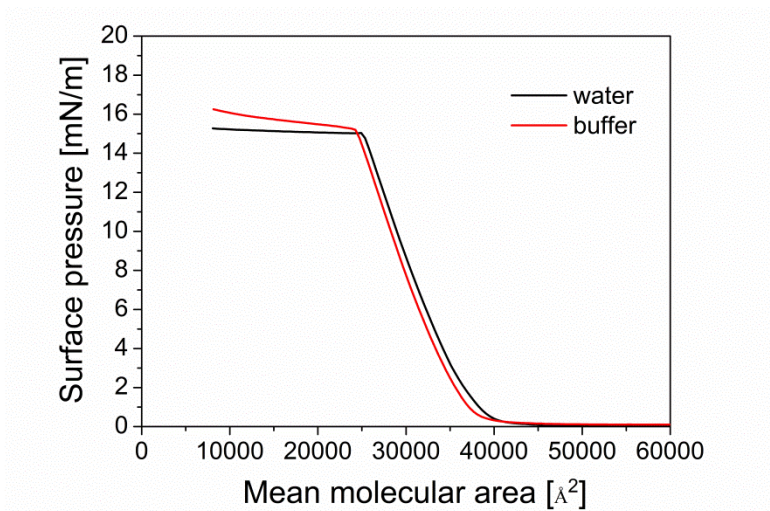

Fig. S2  $\pi$ -A isotherms from PHUE on water and buffer (HEPES with  $\text{Ca}^{2+}$ , 2 mM, pH=7.5)

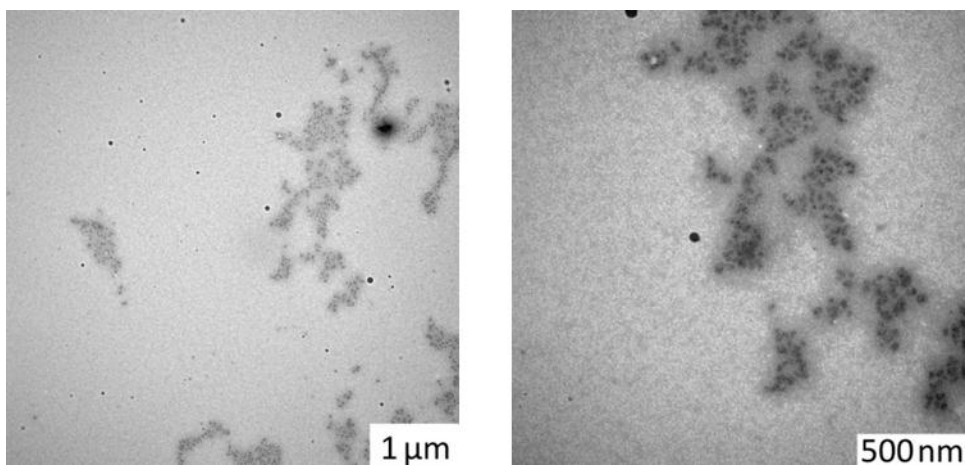

Fig. S3 TEM images of calcium phosphate grown without a PHUE film

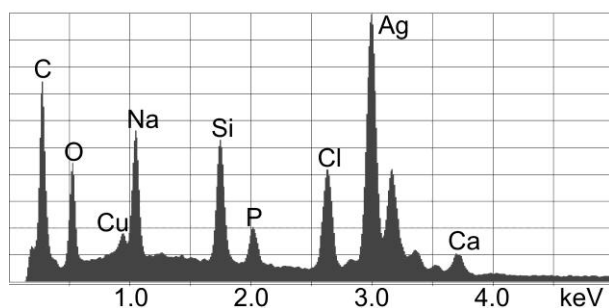

Fig. S4 EDX spectrum of crystals grown in standard conditions (2 mM, 1 h) beneath PHUE-DOPE (0.9 : 0.1) films

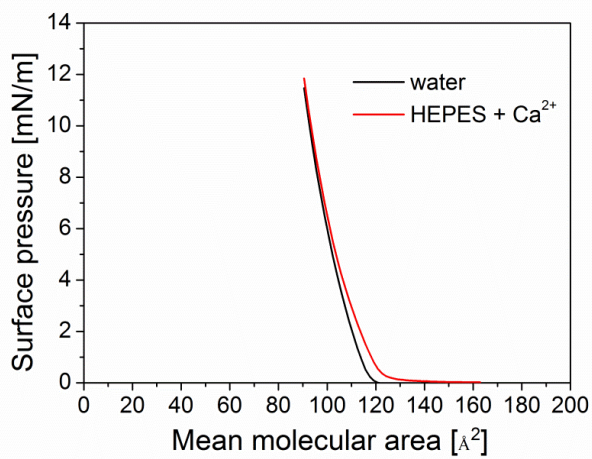

Fig. S5  $\pi$ -A isotherms from DOPS mixed films recorded on water and HEPES with  $\text{Ca}^{2+}$  ions

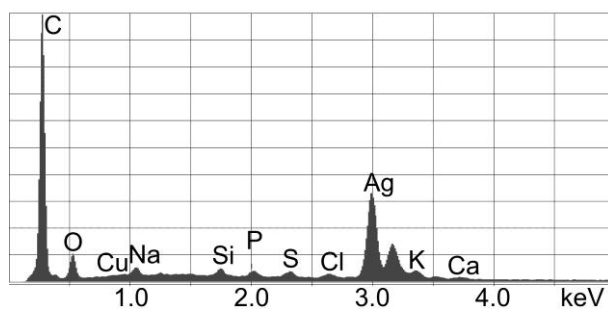

Fig. S6 EDX spectrum of crystals grown in standard conditions (2 mM, 1 h) beneath PHUE-DOPS (0.1 : 0.9) films

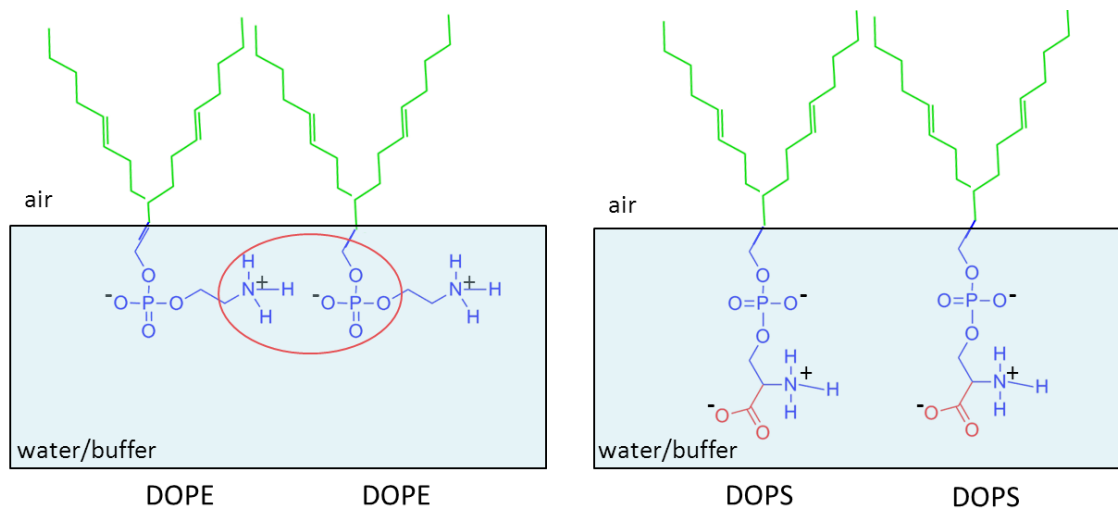

5 Fig. S7 Schematic representation of DOPE and DOPS organization at the air-water interface. Red contour indicates groups involved in charge neutralization between DOPE molecules

Table 1 The  $\Delta G^{\text{exc}}$ , interaction parameter ( $\alpha$ ) and interaction energy ( $\Delta h$ ) for PHUE-lipid mixed films

| $X_{\text{PHUE}}$  | $\Delta G^{\text{exc}}$<br>[kJ/mol] | $\alpha$ | $\Delta h$<br>[kJ/mol] |
|--------------------|-------------------------------------|----------|------------------------|
| <b>PHUE : DOPE</b> |                                     |          |                        |
| 0.9                | -32.10                              | -146.50  | -59.45                 |
| 0.1                | -21.39                              | -97.62   | -39.61                 |
| <b>PHUE : DOPS</b> |                                     |          |                        |
| 0.9                | 43.18                               | 197.04   | 79.96                  |
| 0.1                | 3.59                                | 16.39    | 6.65                   |

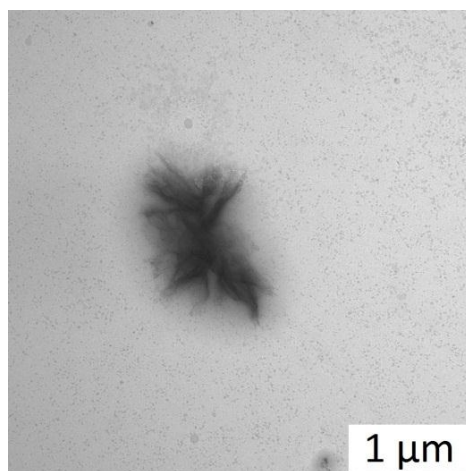

**Fig. S8** TEM image of calcium phosphate grown beneath PHUE-DOPS (0.9 : 0.1) films
